# 1 Annotating Gene Ontology terms for protein sequences with 2 the Transformer model

3 Dat Duong, Lisa Gai, Ankith Uppunda, Don Le, Eleazar Eskin, Jingyi Jessica Li, Kai-Wei  
4 Chang.

5 University of California Los Angeles, California, USA.

6 datdb@cs.ucla.edu, eeskin@cs.ucla.edu, jli@stat.ucla.edu, kwchang@cs.ucla.edu

## 7 Abstract

8 Predicting functions for novel amino acid sequences is a long-standing research problem. The  
9 Uniprot database which contains protein sequences annotated with Gene Ontology (GO) terms,  
10 is one commonly used training dataset for this problem. Predicting protein functions can then  
11 be viewed as a multi-label classification problem where the input is an amino acid sequence and  
12 the output is a set of GO terms. Recently, deep convolutional neural network (CNN) models have  
13 been introduced to annotate GO terms for protein sequences. However, the CNN architecture  
14 can only model close-range interactions between amino acids in a sequence. In this paper, first,  
15 we build a novel GO annotation model based on the Transformer neural network. Unlike the  
16 CNN architecture, the Transformer models all pairwise interactions for the amino acids within a  
17 sequence, and so can capture more relevant information from the sequences. Indeed, we show  
18 that our adaptation of Transformer yields higher classification accuracy when compared to the  
19 recent CNN-based method DeepGO. Second, we modify our model to take motifs in the protein  
20 sequences found by BLAST as additional input features. Our strategy is different from other  
21 ensemble approaches that average the outcomes of BLAST-based and machine learning predictors.  
22 Third, we integrate into our Transformer the metadata about the protein sequences such as 3D  
23 structure and protein-protein interaction (PPI) data. We show that such information can greatly  
24 improve the prediction accuracy, especially for rare GO labels.

## 25 1 Introduction

26 Predicting protein functions is an important task in computational biology. With the cost of  
27 sequencing continuing to decrease, the gap between the numbers of labeled and unlabeled  
28 sequences continues to grow [18]. Protein functions are described by Gene Ontology (GO)  
29 terms [16]. Predicting protein functions is a multi-label classification problem where the  
30 input is an amino acid sequence and the output is a set of GO terms. GO terms are  
31 organized into a hierarchical tree, where generic terms (e.g. cellular anatomical entity)  
32 are parents of specific terms (e.g. perforation plate). Due to this tree structure, if a GO  
33 term is assigned to a protein, then all its ancestors are also assigned to this same protein.

34 When analyzing only the amino acid sequence data to predict protein functions, there  
35 are two major trends. The first trend relies on string-matching models like Basic Local  
36 Alignment Search Tool (BLAST) to match the unknown sequence with labeled proteins  
37 in the database [11]. Recently, Zhang *et al.* [18] combined BLAST with Position-Specific  
38 Iterative Basic Local Alignment Search Tool (PSI-BLAST) to retrieve even more labeled

39 proteins which are possibly related to the unknown sequence. The key idea behind  
40 BLAST methods is to retrieve proteins that resemble the unknown sequence; most likely,  
41 these retrieved proteins will contain similar evolutionarily conserved regions and motifs  
42 (e.g. kinase domain) that match well with the unknown amino acid sequence. Then, all  
43 GO labels assigned to these retrieved proteins are assigned to the unknown sequence [18].  
44 BLAST methods do not explicitly estimate how much a specific motif affects the predicted  
45 probability for a GO label.

46 The second trend transforms the amino acid sequences into features, then applies  
47 classification methods to these features. For example, DeepGO converts an amino acid  
48 sequence into a string of  $k$ -mers, where each  $k$ -mer is represented by a vector so that the  
49 amino acid sequence is represented as a matrix  $m$  [8]. Given  $m$ , the next objective is to  
50 find a function  $f(m, g)$  that returns the correct assignment for the label  $g$ . Neural network  
51 models like DeepGO and related work on DNA sequences use the convolutional neural  
52 network (CNN) as the key component for this function  $f$  [8, 19].

53 In principle, neural network methods are different from BLAST methods; for a specific  
54 GO label, a neural network model tries to extract amino acid patterns in the train data that  
55 are most correlated with label  $g$ . When a test sample contains these amino acid patterns,  
56 then  $f$  will return a high predicted probability for  $g$  given this test sample. To obtain  
57 higher accuracy, one may need a very complex neural network model that can extract  
58 more information from the training samples. However, due to the complex nature of deep  
59 neural networks, it is difficult to say how such patterns, if found, are being analyzed by  
60 the models.

61 In this paper, first, we introduce a novel method GOAT: **GO** annotation based on  
62 the Transformer framework [17]. In the context of protein sequences, the Transformer  
63 architecture is better than a convolutional neural network, because the Transformer models  
64 all the pairwise interactions for the amino acids in the same sequence and can possibly  
65 capture meaningful long-range relationship among these amino acids.

66 Second, we reconcile the gap between BLAST and neural network models. As ex-  
67 plained, BLAST models retrieve sequences with conserved domains and motifs similar  
68 to the unlabeled protein, but do not apply machine learning techniques on these motifs  
69 to predict the GO labels. Neural network models want to correlate these motifs and the  
70 specific labels via the function  $f$ , but are not guaranteed to discover such amino acid  
71 patterns, especially when the annotated datasets are sparse. For this reason, we identify  
72 motifs in the protein sequences via tools like PROSITE [14], and then use this information  
73 as extra features for the label classification.

74 Third, we evaluate how protein metadata such as 3D structures and protein-protein  
75 interaction (PPI) network data can affect the prediction. Our work focuses on neural  
76 network models, whereas previous work such as Zhang *et al.* [18] focused on BLAST-  
77 based methods.

78 In the following sections, we describe two baseline methods and the Transformer  
79 architecture in our software GOAT. Next, we introduce three types of metadata as extra  
80 features for GOAT: Domain (e.g. motifs), 3D-structure, and PPI network information.  
81 We find that in the absence of metadata, GOAT is better than DeepGO [8], especially for  
82 rare GO terms. Additionally, GOAT with protein metadata obtains higher recall rates  
83 than the BLAST-based model in [18]. Our ablation study shows that motif data and 3D

84 folding information are meaningful factors, but PPI network is the most important. We  
85 hope that our software GOAT will serve as a meaningful baseline for future research on  
86 neural network models for GO annotations. GOAT is available at [https://github.com/  
87 datduong/GOAnnotationTransformer](https://github.com/datduong/GOAnnotationTransformer).

## 88 2 Method

### 89 2.1 BLAST and PSI-BLAST

90 We describe our first baseline which is a very competitive BLAST-based method by Zhang  
91 et al. [18]. Zhang et al. [18] consider several best matched proteins from BLAST and  
92 additional sequences attained by PSI-BLAST when predicting annotations. The authors  
93 [18] refer to their BLAST and PSI-BLAST method as the sequence-based module of their  
94 software MetaGO. Here, we refer to it as  $\text{MetaGO}_{\text{BLAST}}$ , and briefly describe this method.  
95 Let  $N^{\text{blast}}$  and  $N^{\text{psiblast}}$  be the number of sequences in the train data retrieved by BLAST  
96 and PSI-BLAST that best match the unknown protein, and  $q$  be a GO label. Next define  
97  $N^{\text{blast}}(q)$  and  $N^{\text{psiblast}}(q)$  as the number of sequences having the label  $q$  in  $N^{\text{blast}}$  and  $N^{\text{psiblast}}$ .  
98 Let  $S_n^{\text{blast}}(q)$  and  $S_n^{\text{psiblast}}(q)$  be the sequence-similarity scores of the  $n^{\text{th}}$  retrieved sequence in  
99  $N^{\text{blast}}(q)$  and  $N^{\text{psiblast}}(q)$  which contains the GO label  $q$ . The assigned prediction probability  
100 for label  $q$  with respect to the unknown query sequence is

$$\text{score}(q) = w \frac{\sum_n^{N^{\text{blast}}(q)} S_n^{\text{blast}}(q)}{\sum_n^{N^{\text{blast}}} S_n^{\text{blast}}} + (1 - w) \frac{\sum_n^{N^{\text{psiblast}}(q)} S_n^{\text{psiblast}}(q)}{\sum_n^{N^{\text{psiblast}}} S_n^{\text{psiblast}}} \quad (1)$$

101 where  $w = \max_n S_n^{\text{psiblast}}$  so that BLAST has a stronger weight when very close homologs  
102 are found [18]. In other words, the prediction scores for the GO labels are scaled by how  
103 similar the query protein is to the known sequences.

### 104 2.2 Convolutional neural network

105 We describe our second baseline DeepGO Kulmanov et al. [8] which is built from the  
106 convolution neural network (CNN) architecture. We consider the DeepGO version which  
107 does not correct for consistent predicted probabilities. Consistency is defined as the fact  
108 that if a GO label is assigned to a protein then all its ancestors must also be assigned  
109 to the same protein. This consistency is corrected for each GO label, where the final  
110 prediction is the maximum of its own predicted probability and the probabilities of its  
111 descendants. In other words, in DeepGO when a descendant of a specific label has high  
112 predicted probability then this label will also have high predicted probability. There  
113 are other types of correction [10] which were not compared in DeepGO. We believe this  
114 research direction requires its own analysis. Moreover, consistency correction relies on  
115 the per-term prediction accuracy. For this reason, we focus comparing GOAT to only the  
116 basic DeepGO.

117 DeepGO converts an amino acid sequence, for example  $p = \text{MARS} \dots$ , into a list of  
118 overlapping 3-mers, e.g. MAR ARS  $\dots$ . Each 3-mer is represented by a vector of in  $\mathbb{R}^{128}$ ,  
119 so that  $p$  is represented by a matrix  $E_p \in \mathbb{R}^{128 \times (L-2)}$  where  $L$  is the sequence length. A  
120 1D-convolution layer, 1D-maxpooling and Flatten are then applied to  $E_p$ , so that we have  
121  $v_p = \text{flatten}(\text{maxpool}(\text{conv1d}(E_p)))$  as the vector representing this k-mer sequence. To  
122 predict a GO label  $i$ , DeepGO fits a logistic regression layer  $\text{sigmoid}(B_i^T v_p + b_i)$  with the  
123 binary cross entropy as the objective loss function.

124 To integrate metadata about the protein (e.g. PPI network), DeepGO concatenates  
125 this information into  $v_p$  before sending it through the logistic layer. For example, in the  
126 original paper, Kulmanov et al. [8] convert proteins from a PPI network into vectors. Let  
127  $c_p \in \mathbb{R}^d$  be the vector representing protein  $p$  in this PPI network; then the classification  
128 layer becomes  $\text{sigmoid}(B_i^T [v_p, c_p] + b_i)$  where  $[v_p, c_p]$  is the concatenation of the two vectors.  
129 We emphasize that the vector  $c_p$  does not have to be from the PPI network; in the results,  
130 we evaluate the DeepGO model with vectors representing 3D structures of proteins (the  
131 outcome of this experiment is not shown in table but explained in result section).

## 132 2.3 GO annotation method with Transformer

133 We introduce our novel GO annotation method with Transformer (GOAT), available at  
134 <https://github.com/datduong/GOAnnotationTransformer>. GOAT takes as an input a  
135 sequence of amino acids and GO labels. For illustration purposes, consider the protein  
136 MAP Kinase-activated Protein Kinase 5 (UniProtKB O54992), which we will refer to by its  
137 id O54992 for brevity. Let  $L$  denote the sequence length, and let  $g_1 \dots g_G$  denote the names  
138 of the labels to be predicted, where  $G$  is the number of labels to be predicted. Our input  
139 will be the string  $MSEDS \dots LPHEPQ g_1 \dots g_G$  of total length  $L + G$ . Next, define  $E$  as  
140 the embeddings for the amino acids, for example  $E_M$  and  $E_S$  are the vectors representing  
141 the amino acids  $M$  and  $S$  respectively.

142 Let  $E^G$  be the embeddings for the GO labels, so that  $E_{g_1}^G$  and  $E_{g_2}^G$  are the vectors  
143 representing the first and second GO label  $g_1$  and  $g_2$  respectively.  $E^G$  is analogous to  
144 Word2vec embedding; except in this case, instead of having a vector for each word in a  
145 corpus, we will have a vector for each GO label in the train and test datasets. In this paper,  
146 we set the vectors represent the amino acids and GO labels to be in the same dimension;  
147 that is,  $E_M$  and  $E_{g_1}^G$  are vectors of the same size. To reduce the number of parameters,  
148 for the GO labels, we fix  $E^G$  as the definition-based GO embeddings from [6] instead of  
149 setting it as a trainable parameter.

150 We add a position vector  $P_j$  to the  $j^{\text{th}}$  amino acid in the sequence; for example, the  
151 first and second amino acid  $M$  and  $S$  will have the following two vectors,  $E_M + P_1$  and  
152  $E_S + P_2$ . We observe that the position embedding makes sense for amino acids so that  
153 the same amino acid appearing at different locations will be treated differently. However,  
154 position embedding does not apply to GO labels; that is, the ordering of the labels should  
155 not affect the prediction outcome. For this reason, we do not add position embedding to  
156 the GO labels.

157 Next, we introduce the region-type embeddings  $R$  to highlight the fact that some  
158 amino acids belong to known motifs. Again consider the protein O54992, which is 473  
159 residues long and contains two key regions: a kinase motif at position 22-304 and a coiled

160 coil domain at position 409-440. In this case the 25<sup>th</sup> amino acid is *T* and is inside the  
 161 kinase motif; for this reason, it will have the vector  $E_T + P_{25} + R_{\text{kinase}}$ . Likewise, the 410<sup>th</sup>  
 162 amino acid is *N* and will have the vector  $E_N + P_{410} + R_{\text{coiled coil}}$ . Amino acids outside any  
 163 key regions will not have region embedding added to them. Motifs can be found by using  
 164 PROSITE; fortunately, many labeled sequences in Uniprot already have this information  
 165 [5, 14].

166 We now describe how the Transformer architecture in GOAT analyzes the input se-  
 167 quence. The original Transformer has 12 layers of encoders and each layer has 12 in-  
 168 dependent identical units (referred to as heads in the original paper) [17]. To keep our  
 169 software manageable for all users, in this paper, we use only one head and so we will  
 170 exclude description of head. We will use 12 layers. The first layer takes as arguments the  
 171 vectors representing the input string. Here we simplify the notation, let  $w_j$  be the vector  
 172 representing the  $j^{\text{th}}$  element in the input string. For protein O54992 of length  $L = 473$   
 173 and  $G$  number of GO labels, from the input string  $MSEDS \dots LPHEPQ g_1 \dots g_G$ , we will  
 174 have for example  $w_{25} = E_T + P_{25} + R_{\text{kinase}}$ , and  $w_{474} = E_{g_1}$ . At the first layer, we have

$$o_{1j} = \sum_{k \in \{1:(L+G)\}} a_{jk} V^1(w_k) \quad (2)$$

$$a_{jk} = \text{softmax}(e_{jk}) \quad (3)$$

$$e_{jk} = Q^1(w_j)^\top K^1(w_k) \quad (4)$$

175  $V^1, Q^1, K^1$  are transformation functions for layer 1.  $o_{1j}$  is a weighted sum of the  
 176 transformed vectors representing itself and the other entities in the input string.  $o_{1j}$   
 177 is then transformed as  $p_{1j} = L_2^1(\text{gelu}(L_1^1 o_{1j}))$  where  $L_1^1$  and  $L_2^1$  are two linear transfor-  
 178 mations with the gelu activation function in between. The final output of Layer 1 is  
 179  $h_{1j} = \text{LayerNorm}(p_{1j} + o_{1j})$ . Loosely speaking, the first layer computes all pairwise in-  
 180 teractions of  $w_j$  and  $w_k$  for all  $k$ , where the attention  $a_{jk}$  in Eq. 3 indicates how much  $w_k$   
 181 contributes toward  $w_j$ .

182 The second layer takes the output of the first layer as its input, so that we have for any  
 183 layer  $i$

$$o_{ij} = \sum_{k \in \{1:L+G\}} a_{jk} V^i(h_{i-1,k}) \quad (5)$$

$$a_{jk} = \text{softmax}(e_{jk}) \quad (6)$$

$$e_{jk} = Q^i(h_{i-1,j})^\top K^i(h_{i-1,k}) \quad (7)$$

184 where  $V^i, Q^i, K^i$  are transformation functions for layer  $i$ . This layer  $i$  will have its own  
 185 linear transformations  $L_1^i$  and  $L_2^i$  to transform  $o_{ij}$ . Again, loosely speaking, layer  $i$  computes  
 186 all pairwise interaction for the output from the previous layer  $i - 1$ .

187 At layer 12, we focus only on the output  $h_{12,k}$  corresponding to the GO labels. Let  
 188 us denote  $h_{12,g_i}$  as the final output for the term  $g_i$ . We use a single linear classifier  
 189  $\text{softmax}(Ch_{12,g_i})$  to return the presence and absence probability of  $g_i$  for the input protein.

190 The same transformation  $C$  is applied to all labels, so that a set  $S$  of GO terms having  
191 similar  $h_{12,g_i \in S}$  will have similar predictions.

192 At each label  $g_i$ , the output  $h_{12,g_i}$  encapsulates all the information from the amino acids  
193 and from all the other labels, so that values which affect  $h_{12,g_i}$  will also affect the output  
194  $h_{12,g_j}$  at another label  $g_j$ . Intuitively, with this fact and the fact that all labels share the  
195 same classifier  $C$ , the prediction at  $g_i$  and  $g_j$  are to some degree correlated. We suspect  
196 that Transformer can model co-occurrences of labels. To validate this, from the T-SNE  
197 plot of the vectors  $h_{12,g_i}$  in the result section, we observe that a label and its ancestors will  
198 be nearby, even when their initial definition embeddings  $E_{g_i}$  in [6] are dissimilar, as is the  
199 case when a term and its distant ancestors can have dissimilar definitions.

200 When there are metadata for the proteins, such as their embedding  $c_p$  from a PPI  
201 network, we can concatenate such embeddings into  $h_{12,g_i}$  as in DeepGO. Next, we use a  
202 two-layer fully connected classifier,  $\text{softmax}(C_1(\text{relu}(C_2[c_p, h_{12,g_i}])))$  to return the presence  
203 and absence probability of  $g_i$ , where  $C_1$  and  $C_2$  are shared for all the labels.

### 204 3 Results

205 We present three main results in the following sections. First, when using amino acid  
206 sequence data alone as input, we show that our adaptation of Transformer in GOAT is  
207 better than the CNN-based DeepGO at predicting protein functions. We will use the  
208 name  $\text{GOAT}_{\text{BASE}}$  and  $\text{DeepGO}_{\text{BASE}}$  to indicate the base implementation in both models,  
209 and ignore the subscripts when the context is clear. Second, we show that GOAT obtains  
210 higher classification accuracy when it takes as extra inputs the motif information from  
211 the protein sequences. We use the name  $\text{GOAT}_{\text{MOTIF}}$  for this version of GOAT. We also  
212 observe how the Transformer architecture in GOAT analyzes the motif information when  
213 it predicts GO labels for an amino acid sequence. Third, because motif information is a key  
214 input of GOAT, we integrate 3D-structure and PPI network metadata about the proteins  
215 on top of our  $\text{GOAT}_{\text{MOTIF}}$  to obtain even better prediction outcome. We use the name  
216  $\text{GOAT}_{\text{MOTIF,3D}}$ ,  $\text{GOAT}_{\text{MOTIF,PPI}}$ ,  $\text{GOAT}_{\text{MOTIF,3D,PPI}}$  to indicate joint inputs in GOAT.

217 We use the datasets from the original DeepGO paper, which contain one dataset each  
218 for the BP, MF, and CC ontologies. We remove proteins without any GO annotations. The  
219 BP, MF and CC datasets have 27279, 18894, and 26660 train proteins, and 9096, 6305, and  
220 8886 test proteins, respectively. In the DeepGO datasets, BP, MF and CC labels annotating  
221 fewer than 250, 50, and 50 proteins are removed. The ancestors of all the terms annotating  
222 one protein are also added into the ground truth label set. In total, the numbers of BP, MF  
223 and CC terms in the label sets are 932, 589, and 439 respectively.

224 We measure the per-label accuracy using Macro and Micro AUC which are the un-  
225 weighted and weighted averages of the AUC at each label, respectively. We are more  
226 interested in the accuracy for rare labels because these labels are closer to the true func-  
227 tions of the proteins. Rare labels affect Macro AUC more than Micro AUC; however a high  
228 Macro AUC does not always guarantee that rare labels are correctly classified. For exam-  
229 ple, the BP term *protein glycosylation* is more precise to a protein function than its ancestors  
230 *metabolic process* and *cellular process*. However, by design, DeepGO datasets include all the  
231 ancestors for a label. The label *protein glycosylation*, *metabolic process* and *cellular process* will

232 now occur 254, 12455 and 19232 times in the data, respectively. If *metabolic process* and  
233 *cellular process* are correctly predicted, then Macro AUC is high but does not imply that  
234 we can properly predict *protein glycosylation*.

235 For this reason, to evaluate the models, we also compute recall-at-k (R@k) which mea-  
236 sures the per-protein accuracy. In practice, a classifier would return  $k$  of most probable  
237 labels for an unknown sequence, which a curator can then review. These  $k$  labels are  
238 referred to as *top-k labels* because they are the  $k$  labels having the highest predicted proba-  
239 bilities for an input sequence. For one protein, R@k measures the fraction of correct labels  
240 retrieved among the top-k labels. We report the final R@k which is the average R@k over  
241 all test samples evaluated with respect to the label set of interest. We evaluate R@k on the  
242 entire label set and also on the sets of rare labels.

### 243 3.1 Base GOAT

244 To compare the base architectures in GOAT and DeepGO, we fit these two models on  
245 only amino acid sequences without any extra information such as motifs or PPI network  
246 data. For DeepGO, we use the same hyperparameters as the original paper [8]. For the  
247 Transformer parameters in GOAT, we set input embedding at size 256 (that is  $E^G \in \mathbb{R}^{932 \times 256}$   
248 for MF), and intermediate vectors at size 512. To keep our software GOAT manageable for  
249 all users, we implement Transformer with only one head and 12 layers. We initialize the  
250 GO embedding  $E^G$  as the pre-trained embedding  $BERT_{LAYER12}$  in [6] which transforms the  
251 GO definitions into vectors, where GOs having related definitions will have comparable  
252 vectors. Using pre-trained GO embeddings reduces the number of parameters in the  
253 Transformer, which can also reduce overfitting, use less GPU memory, and decrease run  
254 time. We train Transformer on a single GTX 1080 Ti with 11GB memory for all three  
255 datasets.

256 In BP, MF and CC data,  $GOAT_{BASE}$  exceeds  $DeepGO_{BASE}$  in Macro and Micro AUC,  
257 indicating that the base implementation of GOAT attains better per-label accuracy (Table  
258 1 row 3 and 5). To estimate per-protein accuracy, we select R@50, R@30, and R@30 for the  
259 BP, MF and CC data, respectively (approximately 5% of total label size). On the whole  
260 data, GOAT increases recall by a small amount. Recall for the entire label set can be  
261 affected by common GO terms which are often easier to classify compared to rare labels.  
262 As discussed in the previous section, accurately predicting rare terms is more important  
263 for the proteins, because rarer labels describe more detailed biological events which reflect  
264 the true properties of the unknown proteins.

265 Table 2 shows the R@k for 232 BP, 143 MF, and 110 CC rare labels which appear below  
266 the 25<sup>th</sup> quantile occurrence frequency in the label sets. For recall rates to make sense in  
267 this case, we compute recall rates for the proteins annotated by at least one of these rare  
268 labels. In the test data, GOAT now has a noticeable improvement over DeepGO, especially  
269 for larger sets of top-k labels (Table 2 row 3 and 5). This evaluation indicates that our  
270 adaptation of the Transformer framework in GOAT can extract more useful information  
271 from the amino acid sequences, and thus obtain higher prediction accuracy.

272 We next evaluate whether our adaptation of Transformer can learn the co-occurrences  
273 of labels. Duong et al. [6] noticed in their GO embedding that when one of the child-  
274 parent GO labels describes very broad biological events (e.g. low IC), then their vector

275 representations may be far apart. This fact implies that for Transformer to work well,  
276 to some degree it must learn the co-occurrences of labels and adjust  $E^G$  so that any two  
277 related GO labels (regardless of their frequencies in the train data, IC values and distance  
278 to roots) will have comparable vectors. To observe that Transformer can implicitly learn  
279 label co-occurrences, we compare the T-SNE plots of the input GO embedding  $E^G$  and its  
280 output  $h_{12,g_i}$  from the Transformer layer 12 which is directly passed into the classification  
281 layer.

282 For every input protein, we have a different value of  $h_{12,g_i}$  for the same label  $g_i$  be-  
283 cause  $h_{12,g_i}$  is function of the vector representing the amino acids. We apply our trained  
284 Transformer on the test set, and take the average  $h_{12,g_i}$  over each input proteins in test data  
285 (denoted as  $\bar{h}_{12,g_i}$ ). We compute  $\bar{h}_{12,g_i}$  from the test data because these proteins are not  
286 seen in training and provide a more realistic evidence. We use  $\bar{h}_{12}^G$  to denote the set of  
287  $\bar{h}_{12,g_i}$  for all  $g_i$ .

288 Figure 1 shows the T-SNE plot of  $E^G$  for the MF labels in DeepGO dataset; we highlight  
289 two terms GO:0008376 (red) and GO:0030291 (blue) and their ancestors. The dot size is  
290 scaled by IC values, where smaller size implies lower IC (so the label is more common).  
291 Smaller dots tend to cluster well together but large dots do not. For example, consider the  
292 term GO:0016740 and its parent GO:0003824 (top right and far left red nodes) which should  
293 often co-occur because in our dataset ancestors of an assigned GO label are included as the  
294 ground truth labels. For Transformer to work well, it should reposition the  $h_{12,g_i}$  vectors  
295 representing GO:0016740 and GO:0003824 closer together.

296 The T-SNE plot of  $\bar{h}_{12}^G$  from Transformer shows that the red and blue nodes have  
297 clustered more closely compared to  $E^G$ . The blue dots now gather at the bottom of Fig,  
298 as compared to being two separated groups in Fig. The two example cases GO:0016740  
299 and GO:0003824 are now near one another, bottom of Fig. However, the lowest level  
300 red node GO:0008376 remains far from its ancestors. The red and blue dots are not yet  
301 tightly compacted into two dense clusters, and so there is room for further development.  
302 In conclusion, Transformer weakly models the co-occurrences of labels even when such a  
303 constraint is not explicitly enforced.



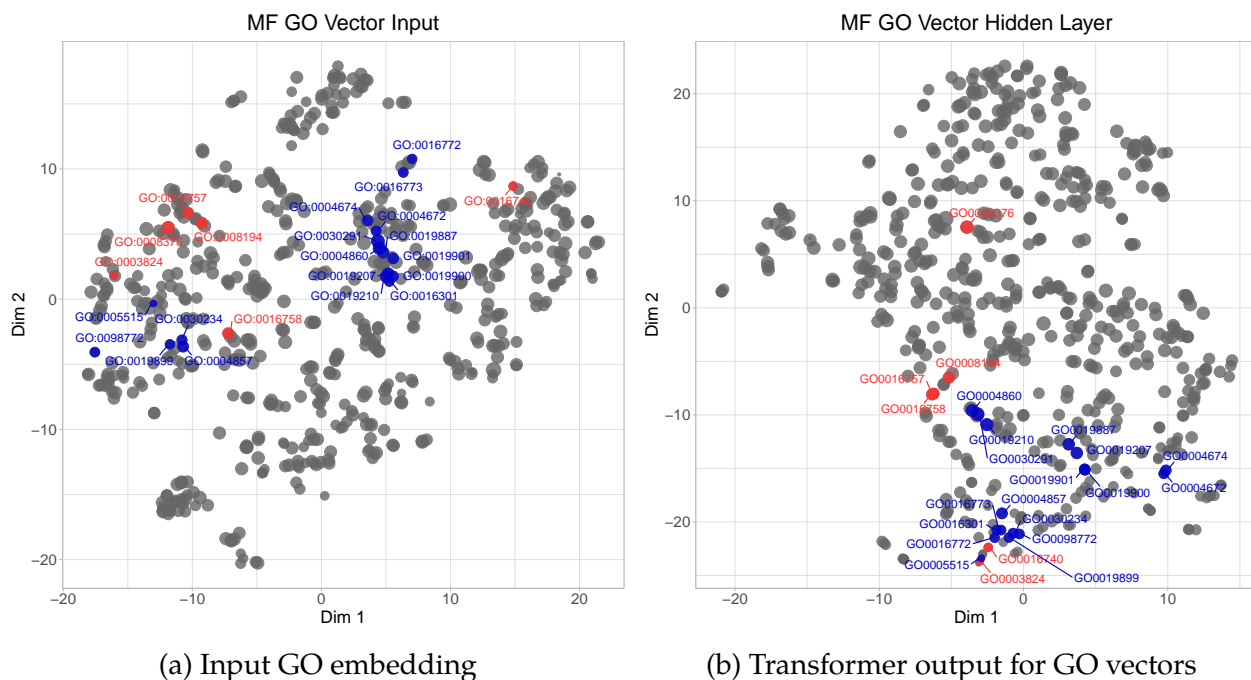

Figure 1: T-SNE of input GO embeddings and their transformed values created by Transformer layer 12.

304

Table 1: Macro AUC, Micro AUC and Recall-at-k (R@k) are evaluated on the entire 932 BP, 589 MF, and 439 CC labels in the original DeepGO data.  $k$  value in R@k corresponds to about 5% of total label size in each dataset.

|                        |            | BP           |              |              | MF           |              |              | CC           |              |              |
|------------------------|------------|--------------|--------------|--------------|--------------|--------------|--------------|--------------|--------------|--------------|
|                        |            | Macro        | Micro        | R@50         | Macro        | Micro        | R@30         | Macro        | Micro        | R@30         |
| <b>BLAST Psi-BLAST</b> |            |              |              |              |              |              |              |              |              |              |
| 1                      | Evalue10   | 65.99        | 81.34        | 48.02        | 76.51        | 87.12        | 69.75        | 64.17        | 89.36        | 77.24        |
| 2                      | Evalue100  | 66.61        | 84.41        | 48.84        | 78.67        | 90.34        | 68.06        | 65.62        | 92.54        | 80.23        |
| <b>DeepGO</b>          |            |              |              |              |              |              |              |              |              |              |
| 3                      | BASE       | 62.60        | 82.17        | 46.13        | 73.90        | 87.49        | 59.63        | 67.12        | 93.07        | 81.47        |
| 4                      | +PPI       | 82.16        | 90.31        | 56.97        | 84.97        | 92.40        | 70.19        | 87.51        | 96.76        | <b>87.98</b> |
| <b>GOAT</b>            |            |              |              |              |              |              |              |              |              |              |
| 5                      | BASE       | 67.69        | 84.46        | 47.40        | 78.67        | 89.43        | 60.46        | 74.94        | 93.95        | 82.98        |
| 6                      | +MOTIF     | 71.04        | 85.64        | 48.65        | 82.53        | 91.12        | 66.19        | 77.62        | 94.51        | 83.01        |
| 7                      | +MOTIF+3D  | 72.62        | 86.09        | 50.76        | 85.38        | 92.72        | 69.23        | 79.57        | 94.95        | 84.22        |
| 8                      | +MOTIF+PPI | <b>83.68</b> | <b>90.49</b> | <b>57.81</b> | <b>88.92</b> | <b>93.98</b> | <b>72.16</b> | <b>90.76</b> | <b>97.23</b> | 87.95        |

Table 2: Recall-at-k (R@k) are evaluated on the most uncommon 232 BP, 143 MF, and 110 CC labels from the entire set of size 932 BP, 589 MF, and 439 CC labels in the original DeepGO data.

|                        |            | BP           |              |              | MF           |              |              | CC           |              |              |
|------------------------|------------|--------------|--------------|--------------|--------------|--------------|--------------|--------------|--------------|--------------|
|                        |            | R@10         | R@20         | R@50         | R@5          | R@10         | R@30         | R@5          | R@10         | R@30         |
| <b>BLAST Psi-BLAST</b> |            |              |              |              |              |              |              |              |              |              |
| 1                      | Evalue10   | 25.13        | 32.59        | 47.33        | 44.87        | 51.11        | 57.51        | 25.09        | 30.91        | 49.27        |
| 2                      | Evalue100  | 21.79        | 29.88        | 46.29        | 42.31        | 48.37        | 60.98        | 21.91        | 29.72        | 50.47        |
| <b>DeepGO</b>          |            |              |              |              |              |              |              |              |              |              |
| 3                      | BASE       | 11.88        | 20.21        | 39.75        | 17.42        | 27.07        | 50.47        | 13.28        | 24.57        | 48.56        |
| 4                      | +PPI       | <b>45.62</b> | <b>57.78</b> | 74.55        | 41.96        | 52.85        | 71.98        | <b>53.14</b> | <b>64.85</b> | 82.58        |
| <b>GOAT</b>            |            |              |              |              |              |              |              |              |              |              |
| 5                      | BASE       | 13.49        | 23.32        | 44.54        | 18.80        | 30.95        | 58.87        | 17.89        | 26.47        | 51.21        |
| 6                      | +MOTIF     | 17.27        | 27.75        | 48.11        | 30.45        | 41.72        | 64.76        | 19.06        | 31.03        | 58.94        |
| 7                      | +MOTIF+3D  | 23.66        | 34.27        | 55.06        | 36.19        | 47.90        | 72.23        | 27.36        | 39.72        | 67.69        |
| 8                      | +MOTIF+PPI | 42.84        | 56.01        | <b>74.78</b> | <b>45.35</b> | <b>59.49</b> | <b>82.67</b> | 48.04        | 62.14        | <b>84.42</b> |

### 3.2 Domains and motifs in amino acid sequences as features

Before the introduction of neural network models, earlier methods often integrated BLAST as a key component. BLAST retrieves annotated proteins in the database that share the same conserved domains or motifs with the unknown sequence, and then assigns the GO labels of these retrieved proteins to the unknown query. Loosely speaking, key domains or motifs shared by the training sequences can then be considered as the key factors in BLAST-based methods. In this section, we evaluate whether neural network models can automatically learn these key patterns from the training sequences, and explain how to introduce these patterns as input features to GOAT.

For fair comparison, we select a very strong BLAST baseline  $\text{MetaGO}_{\text{BLAST}}$  [18] and apply it to the same DeepGO datasets. We emphasize that  $\text{MetaGO}_{\text{BLAST}}$  in [18], which matches multiple related sequences to the query, has much stronger performance than the BLAST baseline used in DeepGO where the authors select only a single best matching sequence [8]. We build the BLAST database from the DeepGO train data. For BLAST and PSI-BLAST, we perform the experiments using both e-value at 10 and 100. Lower e-values leave too many unmatched testing sequences; for example, in the CC dataset at e-value 1, only 7236 out of 8886 test samples match to some sequences in the train data. Moreover, in the context of finding possible protein functions, a higher e-value can allow for higher recall rates.

In BP and MF data,  $\text{MetaGO}_{\text{BLAST}}$  is better than the base DeepGO and GOAT; for example,  $\text{MetaGO}_{\text{BLAST}}$  yields better recall rates on rare labels (Table 1 and 2 row 1–3 and 5). We emphasize that  $\text{MetaGO}_{\text{BLAST}}$  and  $\text{GOAT}_{\text{BASE}}$  have comparable recall on rare MF labels for larger top-k label sets. Arguably,  $\text{MetaGO}_{\text{BLAST}}$  and GOAT retrieve the same number of correct labels, but GOAT makes more spurious predictions. DeepGO however does not come close to  $\text{MetaGO}_{\text{BLAST}}$  on recall rates. The convolutional network in DeepGO is likely not complex enough to learn motifs shared among the sequences with related

331 functions, which BLAST or PSI-BLAST can detect.

332 When evaluated on the entire CC data, the base DeepGO and Transformer outperform  
333 MetaGO<sub>BLAST</sub>. However, for rare CC labels, when compared to MetaGO<sub>BLAST</sub>, Transformer  
334 has higher R@30 but lower R@5 and R@10. To some degree, our current GOAT is not yet  
335 better than MetaGO<sub>BLAST</sub>.

336 We had hoped that the complex Transformer architecture in GOAT would have learned  
337 key motifs missed by the simpler convolutional neural network in DeepGO, but this is not  
338 the case. There are information about the amino acid sequence that we must explicitly  
339 specify for GOAT to function better. For this reason, we use the motifs extracted by string-  
340 matching methods as inputs to our method GOAT. For example, we can apply PROSITE  
341 to scan the protein database for known motifs in a given input sequence [14]. Loosely  
342 speaking, we are combining motif-based methods and the Transformer architecture into  
343 one pipeline by taking the output of motif-based models and passing them as inputs to  
344 our Transformer. Our strategy is different from an ensemble approach that would average  
345 the prediction of independent predictors.

346 In the manually reviewed Uniprot database, each protein already has a Family & Do-  
347 mains section describing its key regions [16]. We then add these region types of the amino  
348 acids as input features into our method GOAT. We emphasize that not all domains are  
349 meaningful at predicting labels in a certain ontology. For example, Serine/threonine-  
350 protein kinase TBK1 (UniProtKB number Q9UHD2) has a kinase domain at position 9-310  
351 (PROSITE annotation rule PRU00159). However, kinase domain involves in a wide range  
352 of biological processing at various locations in the cell like metabolism, transcription,  
353 cytoskeletal rearrangement and movement, and cell apoptosis and differentiation [7, 13].  
354 Thus, this kinase domain in Q9UHD2 tells us which Molecular Functions are more likely  
355 to be assigned, but this domain cannot tell which Biological Processes or Cellular Com-  
356 ponents Q9UHD2 will have.

357 For each protein in the original DeepGO datasets, we download its sequence annotation  
358 rule (e.g. PROSITE rule) from the 2019 data at <https://www.uniprot.org/>. We do not  
359 consider region types for sequences that have changed in length; otherwise, we consider  
360 region types only for portions that have not changed in amino acids composition. Uniprot  
361 data divides region types into subgroups. Some subgroups require curated comments and  
362 are not truly applicable for analyzing new proteins; for example, the subgroup Domain  
363 Non-positional Annotation is not determined by sequence analysis.

364 We use the following six subgroups which can be found by sequence analysis: Zinc  
365 finger (e.g. C2H2-type), Repeat (e.g. AA tandem repeat), Motif (e.g. LXXLL motifs),  
366 Compositional bias (e.g. Asp/Glu-rich), Coiled coil (e.g. Leucine-zippers), Domain (e.g.  
367 Ser/Thr kinase domain). In the original DeepGO datasets, we found 1629, 1450 and 1655  
368 amino acid region types for the BP, MF and CC train data, respectively. Region types  
369 found in test sequences but not seen in the train data are set as zero; effectively we treat  
370 these cases as if the region types do not exist. To model the region types in the amino acid  
371 sequence, we apply the region-type embedding  $R$  explained in section ; for example, in  
372 BP ontology we will have a embedding  $R \in \mathbb{R}^{1629 \times 256}$ . We will use the name MOTIF to  
373 denote all types of Domain information in these six subgroups reported by The UniProt  
374 Consortium [16].

375 When evaluated on the entire data, GOAT<sub>MOTIF</sub> obtains better AUCs and comparable

376 recall rates to  $\text{MetaGO}_{\text{BLAST}}$  (Table 1 row 6). When evaluated on rare labels, our GOAT  
377 has subpar recalls when the top-k label set is small; however, for larger top-k label set,  
378 especially in MF and CC data, GOAT retrieves more correct labels (Table 2 row 6). This  
379 result implies that  $\text{GOAT}_{\text{MOTIF}}$  is a better classifier when the top-k label set is larger. Our  
380 result also highlights an important point. Ideally, a neural network should teach itself the  
381 patterns associated with certain key protein functions. However, a neural network may  
382 fail to learn such key information, and needs these inputs to be explicitly provided. These  
383 key domains within a sequence are often easily obtained, and in fact already available in  
384 Uniprot.

385 To observe how the MOTIFS are analyzed by the Transformer architecture in GOAT, we  
386 select the human protein Serine/threonine-protein kinase TBK1 (UniProtKB Q9UHD2) in  
387 DeepGO test data. As described in section 3.2, we concatenate the amino acid sequence  
388 and GO labels into one single input into GOAT. Q9UHD2 is 729 amino acids long, and  
389 when predicting MF labels, the input into GOAT is then a string of amino acids and GO  
390 labels of length 1318 (from 729 + 589 MF labels). We [...something about region-type emb]  
391 integrate into the Transformer framework the three key domains in Q9UHD2 derived from  
392 sequence analysis methods; these are Protein Kinase at 9-310, Ubiquitin-like at 309-385,  
393 and Coiled coil at 407-713. The vertical and horizontal red lines indicate these regions in  
394 the attention heatmap (Figure 2).

395 We plot the attention heatmap of  $\alpha_{jk}$  in each layer (Figure 2).  $\alpha_{jk}$  measures how much  
396 position  $k$  contributes toward position  $j$  (Eq. 3). Each row in the heatmap adds to 1. The  
397 heatmap is divided into four quadrants. The first quadrant shows the interactions of GO  
398 labels among themselves (e.g.  $\alpha_{jk}$  for  $j, k \in [730, 1318]$ ), the second shows contribution  
399 of amino acids toward the GO labels, the third shows interactions of amino acids among  
400 themselves (e.g.  $\alpha_{jk}$  for  $j, k \in [1, 729]$ ), and the fourth shows contribution of GO labels  
401 toward the amino acids.

402 Transformer without region-type embedding has a noisy attention heatmap (Appendix  
403 Fig. 3). Transformer with region-type embedding displays meaningful patterns (Fig. 2).  
404 For example, layer 1 illustrates the cross interactions between Protein Kinase and Coiled  
405 coil domain (black boxes quadrant 3); whereas layer 4 and 8 show interactions within the  
406 Protein Kinase and Coiled coil themselves. In layer 12, the final vectors representing GO  
407 labels receive more attention from the Protein Kinase than the other regions (top right box  
408 quadrant 2). Because these final output vectors are sent to the classification layer, we can  
409 assume that the Protein Kinase region contributes more to the label annotation compared  
410 the other domains. This observation is consistent with the true molecular functions of  
411 Q9UHD2 which are: phosphoprotein binding, protein kinase activity, protein phosphatase  
412 binding, and protein serine/threonine kinase activity.

Figure 2: Heatmap of the attention values  $\alpha_{jk}$  in each layer when analyzing the protein kinase TBK1 (UniProtKB Q9UHD2). The three key regions of this sequence (separated by red lines) are explicitly given as inputs to the Transformer model. The first quadrant shows the interactions among the GO labels, the second shows contribution of amino acids toward the GO labels, the third shows interactions of amino acids among themselves, and the fourth shows contribution of GO labels toward the amino acids.

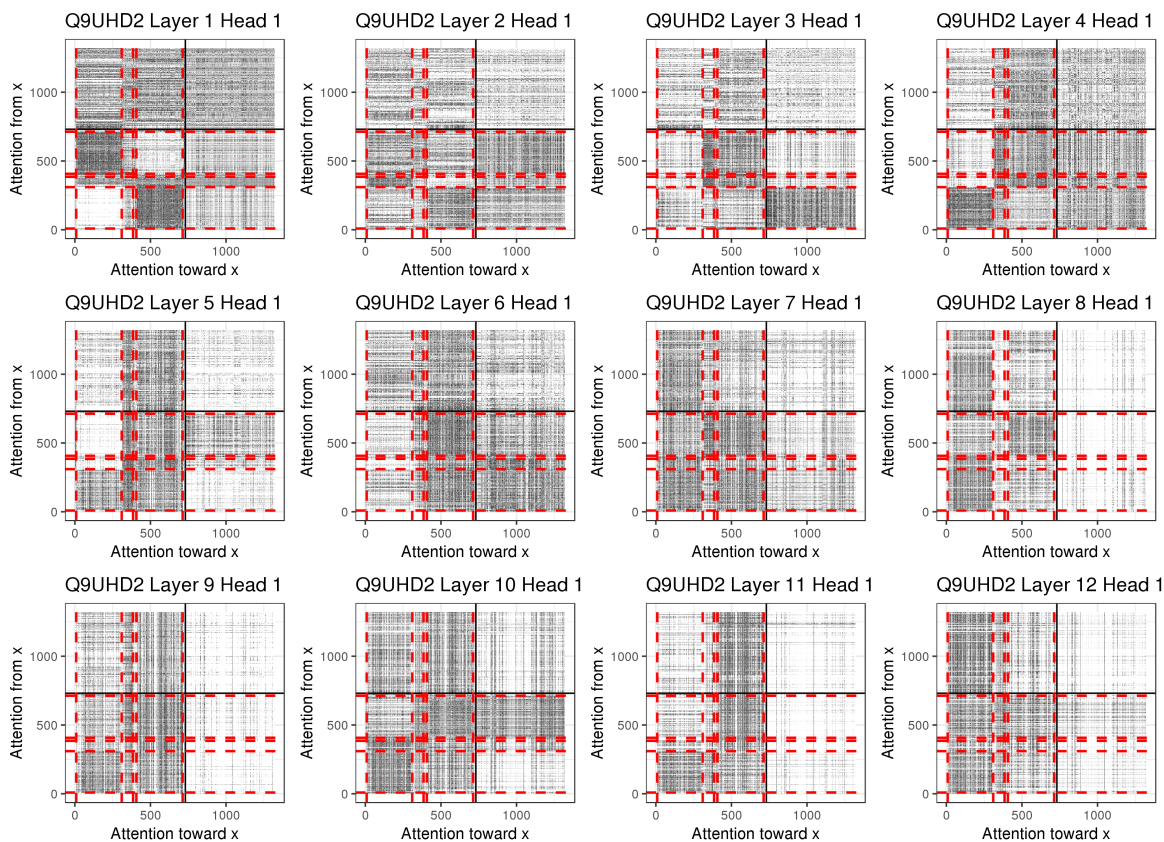

### 413 3.3 Protein vectors as features

414 Zhang et al. [18] evaluates how PPI network and 3D structure data affect the annotation  
415 accuracy for methods built from BLAST. In this paper, we assess the contributions of  
416 these components in the context of a neural network classifier. The amino acid sequences  
417 have already been used in neural network models, as described in DeepGO and our  
418 GOAT. Any other information about protein must come from some external resources  
419 such as the STRING database [15]. For example, one can train a neural network on the  
420 STRING database to transform interacting proteins into similar vectors [1, 4]. Integrating  
421 these protein vector representations into annotation methods is motivated by the fact  
422 that interacting proteins (ideally encoded into similar vectors) should have closely related  
423 functions (e.g. found in the same biological processes and cellular locations).

424 It is only recently that proteins in knowledge graph have been transformed into vectors  
425 via neural network models. In this paper, we will not build new models to encode  
426 proteins from knowledge graph, and reserve this topic for future work. We will focus on

427 evaluating how much can protein vectors built from external data sources increase the  
428 prediction accuracy.

### 429 3.3.1 Vectors representing protein 3D structure

430 We evaluate protein vectors that capture high-level 3D shapes of the proteins (e.g.  $\alpha$ -  
431 helices and  $\beta$ -sheets) [3]. [3] applied a 3-layer Bidirectional Long-Short Term Memory  
432 (BiLSTM) to encode an amino acid sequence into a matrix. [3] trained their model on the  
433 SCOP database and residue-residue contact prediction. The SCOP database describes the  
434 major classes of 3D-structures often seen in proteins. Their model was trained on SCOPe  
435 ASTRAL 2.06 dataset with 22,408 amino acid sequences, and each training epoch has  
436 100,000 pairs sampled from these 22,408 sequences [3]. From SCOP, Bepler and Berger [3]  
437 predict whether two protein sequences have no relationship, class-level relationship, fold-  
438 level relationship, superfamily-level relationship, or family-level relationship (e.g. label  
439  $y = 0, 1, 2, 3, 4$ ) [3]. For example, two proteins with the same Rossmann-fold structural  
440 motif have a class-level relationship ( $y = 1$  in this case). Residue-residue contact prediction  
441 is applied within the same protein sequence; the objective is to predict whether each pair  
442 of positions  $i, j$  within the same protein are close by (distance less than 8 angstroms) in  
443 the 3D structure. Bepler and Berger [3] provide the pre-trained encoder which can return  
444 a matrix for any amino acid sequence, even those not used in training. In this paper, we  
445 take the mean-pool of this matrix to represent the entire sequence.

446 Because motif information is a key input of GOAT, we integrate 3D-structure data on  
447 top of our GOAT<sub>MOTIF</sub>. We emphasize that 3D-structures and motifs are targeting two  
448 different kinds of information; for example, a kinase domain does not strictly entail a  
449 specific folding pattern. For this reason, GOAT<sub>MOTIF,3D</sub> improves upon GOAT<sub>MOTIF</sub> (Table  
450 1 row 7). More importantly, for a larger top-k label set, GOAT is much better than  
451 MetaGO<sub>BLAST</sub>, where our recall rates increase by about 9%, 12%, and 17% in BP, MF and  
452 CC data respectively (Table 2 row 7). Our results indicate that GOAT find fewer correct  
453 labels when the set of top-k labels is small; however, GOAT will retrieve more correct  
454 labels than MetaGO<sub>BLAST</sub> for larger set of top-k labels.

455 When we replace the PPI network in DeepGO with the vectors from SCOP in [3], the  
456 performance significantly decreases. Macro AUC in DeepGO drops from 82.16 to 66.54  
457 in BP, from 84.97 to 77.78 in MF, and from 87.51 to 68.93 in CC data. This decrement is  
458 anticipated as we will argue in the next section, that protein interaction network has more  
459 impact than 3D-structure information.

### 460 3.3.2 Vectors representing proteins in interaction network

461 We evaluate protein vectors that capture their relatedness in a protein-protein interaction  
462 network. To be consistent with DeepGO, we use the same protein vectors in their paper  
463 as input features for our GOAT. These vectors are created following the method in [1]. In  
464 brief, DeepGO uses vectors representing the protein names in a protein-protein interaction  
465 (PPI) network that has 8,478,935 proteins, and 11,586,695,610 edges total (derived from  
466 STRING database). Following [1], DeepGO uses DeepWalk [?] to generate sentences from

467 the network, and apply Word2Vec [9] to these sentences to create the vector embedding  
468 for the protein names. Effectively, interacting proteins will have similar vectors.

469 Because Domain information is a key input of GOAT, we integrate PPI network data  
470 on top of our GOAT<sub>MOTIF</sub>. GOAT<sub>MOTIF,PPI</sub> exceeds the other Transformer models by large  
471 margins (Table 1 row 8). On the entire label sets, in the presence of PPI network information  
472 GOAT and DeepGO perform similarly, despite the fact that GOAT can better extract  
473 information from the amino acid sequence (Table 1 row 4 and 8). Only for rare MF labels  
474 does GOAT exceed DeepGO at every R@k by noticeable margins (Table 2 row 4 and 8).

475 Intuitively, it is reasonable that PPI network dominates the information from amino  
476 acid sequences at classifying BP and CC labels, but not for MF labels. For example, two  
477 interacting proteins can have distinct 3D structures and sequences (and thus motifs); yet,  
478 they involve in the same biological process and sometimes found at the same cellular  
479 components. The same two interacting proteins however can have dissimilar molecular  
480 functions because they can induce very different chemical reactions.

481 We emphasize that vectors of PPI network in DeepGO does not need amino acid  
482 sequence to retrieve vectors representing the proteins. However, this method will not  
483 return vector representations for novel proteins not yet existed in the database. In practice,  
484 for proteins not yet well studied, we may need a different approach and other metadata  
485 for such proteins. We reserve this topic for future research work.

### 486 3.4 Evaluation on sparse GO labels

487 Many GO terms annotate only a few proteins because protein functions can be very  
488 unique. In practice, parametric predictors must handle sparse labels to predict terms that  
489 closely resemble the true protein functions. Yet, parametric models can fail when the  
490 train data has too many sparse labels. In such cases, GOAT and DeepGO accuracy will  
491 drop, because we need a label to have enough samples to reliably train the parameters in  
492 a neural network model. It is then important to evaluate GOAT and DeepGO against the  
493 nonparametric MetaGO<sub>BLAST</sub> which does not have trainable parameters.

494 We evaluate GOAT and DeepGO on datasets that contain more rare labels. We reuse  
495 the same proteins in the original DeepGO data but include labels with at least 50, 10, and  
496 10 occurrences in the BP, MF and CC train data, whereas the same criteria in the original  
497 DeepGO are 250, 50 and 50. Our larger datasets now have 2980 BP, 1697 MF and 989 CC  
498 labels, respectively (versus the original 932 BP, 589 MF, and 439 CC labels). For each added  
499 term, we include its ancestors as the gold-standard labels, so that most of the labels in the  
500 original data now have higher occurrence frequencies.

501 We train the models on the entire larger dataset. In this experiment, we also include a  
502 GOAT<sub>PPI</sub> to evaluate the contribution of the PPI network data alone, and a GOAT<sub>MOTIF,3D,PPI</sub>  
503 to evaluate the most complete model. In this experiment, we are less interested in the  
504 common labels, and evaluate R@k for the extra 2048 BP, 1108 MF and 550 CC labels which  
505 are sparse compared to the labels in the original DeepGO data; for example, 95% of the  
506 extra labels occur below 252, 34, and 68 times in the BP, MF and CC train data, respectively.  
507 Table 3 shows the R@k for these sparse labels.

508 In Table 3, the base GOAT and DeepGO perform worst than MetaGO<sub>BLAST</sub>. We em-  
509 phasize that in this case, GOAT is still has better performance than DeepGO for MF and

510 CC data, but not for BP data (row 3 and 5). The PPI network data appears to be the most  
 511 important factor; for example,  $GOAT_{MOTIF,3D}$  is about the same as  $MetaGO_{BLAST}$ , whereas  
 512 all the models with PPI network achieve higher R@k than  $MetaGO_{BLAST}$  (Table 3).

513 When predicting biological processes, in the presence of PPI network embedding, the  
 514 other protein metadata and the types of neural network model for amino acid sequences  
 515 are not as important (Table 3 row 4, and 7–9). This result is an empirical evidence  
 516 supporting our earlier hypothesis that PPI network can dominate sequence information;  
 517 that is, two interacting proteins should be involved in the same biological processes even  
 518 when their sequences display dissimilar motifs, 3D structures, or any other types of hidden  
 519 information to be extracted by neural network models.

520 For MF and CC labels, integrating just PPI network embedding into DeepGO is not  
 521 enough to raise recall rates; in this case, our GOAT model, Domain information and SCOP  
 522 data are important complementary factors to the PPI network embedding. Indeed, for  
 523 MF labels, in the presence of PPI network embedding, GOAT also benefits when having  
 524 Domain and 3D-structure information as extra features (Table 3 row 7 and 9). For CC  
 525 labels, the same observation holds true, except that Domain information now has more  
 526 impact than 3D-structure data (Table 3 row 8 and 9).

Table 3: We increase the label size in the original DeepGO data from 932 BP, 589 MF, and 439 CC labels to 2980 BP, 1697 MF and 989 CC labels. Models are trained on the entire label sets, but R@k are evaluated only for the added 2048 BP, 1108 MF and 550 CC labels which are sparse. R@k are computed with respect to only proteins having these labels; there are 7850, 2671, and 1848 such proteins out of 9095, 6294, and 8886 samples in BP, MF and CC test data.

|                        |               | BP           |              |              | MF           |              |              | CC           |              |              |
|------------------------|---------------|--------------|--------------|--------------|--------------|--------------|--------------|--------------|--------------|--------------|
|                        |               | R@40         | R@70         | R@100        | R@40         | R@70         | R@100        | R@10         | R@30         | R@50         |
| <b>BLAST Psi-BLAST</b> |               |              |              |              |              |              |              |              |              |              |
| 1                      | Evalue10      | 30.30        | 34.84        | 37.88        | 38.67        | 41.09        | 43.42        | 20.80        | 29.15        | 33.13        |
| 2                      | Evalue100     | 29.53        | 34.57        | 38.02        | 38.58        | 43.32        | 45.81        | 23.47        | 35.23        | 39.78        |
| <b>DeepGO</b>          |               |              |              |              |              |              |              |              |              |              |
| 3                      | BASE          | 23.14        | 27.98        | 32.01        | 16.62        | 23.83        | 29.60        | 22.49        | 31.53        | 37.96        |
| 4                      | +PPI          | <b>48.06</b> | 55.86        | 61.02        | 41.61        | 48.61        | 53.39        | 47.89        | 60.77        | 66.48        |
| <b>GOAT</b>            |               |              |              |              |              |              |              |              |              |              |
| 5                      | BASE          | 23.78        | 28.82        | 32.69        | 19.41        | 27.88        | 34.19        | 25.22        | 35.98        | 42.53        |
| 6                      | +MOTIF+3D     | 27.70        | 33.50        | 38.03        | 30.52        | 38.74        | 45.44        | 25.73        | 37.82        | 44.42        |
| 7                      | +PPI          | 43.51        | 52.52        | 58.54        | 41.77        | 52.46        | 58.51        | 41.98        | 60.02        | 68.70        |
| 8                      | +MOTIF+PPI    | 46.22        | 55.06        | 61.08        | 45.69        | 55.32        | 61.11        | <b>50.08</b> | <b>67.15</b> | 73.89        |
| 9                      | +MOTIF+3D+PPI | 46.78        | <b>56.24</b> | <b>62.49</b> | <b>50.92</b> | <b>60.77</b> | <b>66.64</b> | 47.96        | 65.30        | <b>74.36</b> |

## 527 4 Discussion

528 In this paper, we introduce the novel **GO** annotation method with Transformer (GOAT).  
 529 We show that for predicting protein annotations, our Transformer architecture in GOAT  
 530 is better than the convolutional neural network in DeepGO. We then provide GOAT three  
 531 types of extra features: Domain information, 3D-structure and PPI network data. These



532 features further increase the accuracy of GOAT, but PPI network information has the most  
533 impact.

534 Previous software MetaGO of Zhang *et al.* [18] has also combined sequence data,  
535 3D-structure and PPI network information to annotate GO labels. We emphasize that  
536 in MetaGO, each type of metadata is used to build its own classifier, and then these  
537 independent classifiers are then combined to produce the final prediction for a GO label  
538 and an input sequence. For example, Zhang *et al.* [18] built their MetaGO<sub>BLAST</sub> as an  
539 independent unit from the their two classifiers that uses PPI network and 3D-structure  
540 data. The reason for their strategy is that BLAST algorithm, which is similar to Smith-  
541 Waterman, does not need the interacting partners and 3D-structure of the input sequences  
542 [2]. Unlike BLAST-based methods, DeepGO and GOAT can jointly analyze the amino acid  
543 sequences, PPI network and 3D-structure information. In the future work, we wish to  
544 integrate components of MetaGO into GOAT, and vice versa.

545 We discuss a key property of our Transformer in the context of GO embeddings.  
546 This Transformer learns the co-occurrences among the labels; for example, the last layer  
547 in Transformer returns comparable vectors for a child and parent GO label (Fig. 1). GO  
548 embeddings produced by our Transformer are not equivalent to the embeddings produced  
549 by factorizing the co-occurrence matrix of GO labels, because GO embeddings from our  
550 Transformer are also affected by information from the amino acid sequence (Fig. 2). For  
551 our future work, we will integrate embedding learned from co-occurrence frequencies  
552 into our Transformer framework.

553 We outline a two key limitations of our adaptation of Transformer. First, in this paper, to  
554 make our software GOAT accessible to many users, we have reduced the standard number  
555 of parameters that Transformer often assume in other machine learning applications; for  
556 example, Rives *et al.* [12] trained a language model on protein sequences using a 36-layer  
557 Transformer. We expect that our GO annotation accuracy to increase if we train our model  
558 with more parameters and on more samples from the Uniprot database.

559 Second, we do not pre-train our Transformer. For example, before predicting GO  
560 labels, Transformer can be trained only on protein sequences with the following objective.  
561 We can remove amino acids from a sequence, and then use Transformer to retrieve these  
562 missing amino acids. Pre-training helps the parameters in Transformer to converge better  
563 for the latter tasks; however pre-training requires a lot of data, for example Rives *et al.* [12]  
564 pre-trained their model on 250 million sequences. For our future work, we will consider  
565 training a large-scale Transformer model to predict GO labels for protein sequences.

## 566 5 Appendix

Figure 3: Heatmap of the attention values  $\alpha_{jk}$  in each layer. Motifs of the sequences are not explicitly given as inputs to this Transformer model.

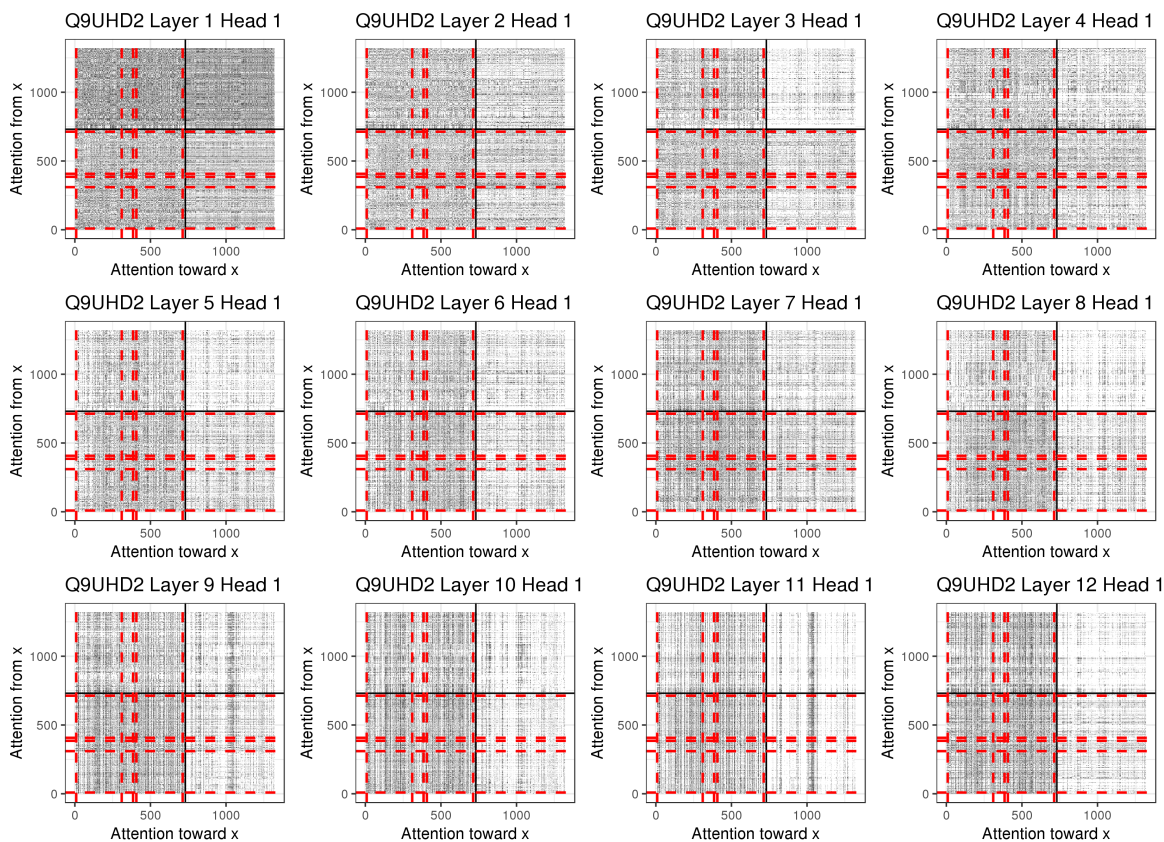

## 567 References

- 568 [1] Alshahrani, M., Khan, M.A., Maddouri, O., Kinjo, A.R., Queralt-Rosinach, N. and Hoehndorf, R. (2017). Neuro-symbolic representation learning on biological knowledge graphs. *Bioinformatics*, **33**(17), 2723–2730.
- 569
- 570
- 571 [2] Altschul, S.F., Gish, W., Miller, W., Myers, E.W. and Lipman, D.J. (1990). Basic local alignment search tool. *Journal of Molecular Biology*, **215**(3), 403–410.
- 572
- 573 [3] Bepler, T. and Berger, B. (2019). Learning protein sequence embeddings using information from structure. *arXiv preprint arXiv:1902.08661*.
- 574
- 575 [4] Chen, M., Ju, C.J.T., Zhou, G., Chen, X., Zhang, T., Chang, K.W. et al (2019). Multifaceted protein–protein interaction prediction based on siamese residual rnn. *Bioinformatics*, **35**(14), i305–i314.
- 576
- 577
- 578 [5] De Castro, E., Sigrist, C.J., Gattiker, A., Bulliard, V., Langendijk-Genevaux, P.S., Gasteiger, E. et al (2006). Scanprosite: detection of prosite signature matches and prorule-associated functional and structural residues in proteins. *Nucleic acids research*, **34**(suppl\_2), W362–W365.
- 579
- 580

- 581 [6] Duong, D., Uppunda, A., Ju, C., Zhang, J., Chen, M., Eskin, E. et al (2019). Evaluating  
582 representations for gene ontology terms.
- 583 [7] Dworkin, J. (2015). Ser/thr phosphorylation as a regulatory mechanism in bacteria. Current  
584 opinion in microbiology, **24**, 47–52.
- 585 [8] Kulmanov, M., Khan, M.A. and Hoehndorf, R. (2017). Deepgo: predicting protein functions  
586 from sequence and interactions using a deep ontology-aware classifier. Bioinformatics, **34**(4),  
587 660–668.
- 588 [9] Mikolov, T., Sutskever, I., Chen, K., Corrado, G.S. and Dean, J. (2013). Distributed represen-  
589 tations of words and phrases and their compositionality. In Advances in neural information  
590 processing systems, pages 3111–3119.
- 591 [10] Obozinski, G., Lanckriet, G., Grant, C., Jordan, M.I. and Noble, W.S. (2008). Consistent  
592 probabilistic outputs for protein function prediction. Genome Biology, **9**(1), S6.
- 593 [11] Profiti, G., Martelli, P.L. and Casadio, R. (2017). The bologna annotation resource (bar 3.0):  
594 improving protein functional annotation. Nucleic acids research, **45**(W1), W285–W290.
- 595 [12] Rives, A., Goyal, S., Meier, J., Guo, D., Ott, M., Zitnick, C.L. et al (2019). Biological structure  
596 and function emerge from scaling unsupervised learning to 250 million protein sequences.  
597 bioRxiv, page 622803.
- 598 [13] Schwartzberg, P.L. (1998). The many faces of src: multiple functions of a prototypical tyrosine  
599 kinase. Oncogene, **17**(11), 1463.
- 600 [14] Sigrist, C.J., De Castro, E., Cerutti, L., Cuče, B.A., Hulo, N., Bridge, A. et al (2012). New and  
601 continuing developments at prosite. Nucleic acids research, **41**(D1), D344–D347.
- 602 [15] Szklarczyk, D., Gable, A.L., Lyon, D., Junge, A., Wyder, S., Huerta-Cepas, J. et al (2019).  
603 String v11: protein–protein association networks with increased coverage, supporting functional  
604 discovery in genome-wide experimental datasets. Nucleic acids research, **47**(D1), D607–D613.
- 605 [16] The UniProt Consortium (2018). UniProt: the universal protein knowledgebase. Nucleic  
606 Acids Research, **46**(5), 2699–2699.
- 607 [17] Vaswani, A., Shazeer, N., Parmar, N., Uszkoreit, J., Jones, L., Gomez, A.N. et al (2017). Attention  
608 is all you need. In Advances in neural information processing systems, pages 5998–6008.
- 609 [18] Zhang, C., Zheng, W., Freddolino, P.L. and Zhang, Y. (2018). Metago: Predicting gene  
610 ontology of non-homologous proteins through low-resolution protein structure prediction and  
611 protein–protein network mapping. Journal of molecular biology, **430**(15), 2256–2265.
- 612 [19] Zhou, J. and Troyanskaya, O.G. (2015). Predicting effects of noncoding variants with deep  
613 learning–based sequence model. Nature methods, **12**(10), 931–934.
